# Supplementary material
Source: HighWire-hosted journal article supplement (https://www.jpn.ca/highwire/filestream/89464/field_highwire_adjunct_files/0/jpn-170132-1-at.pdf)
Supplement: jpn-170132-1-at.pdf [file jpn-170132-1-at.pdf]

DOI: 10.1503/jpn.170132

Copyright © 2017 The Author(s) or their employer(s). To receive this resource in an accessible format, please contact us at [cmajgroup@cmaj.ca](mailto:cmajgroup@cmaj.ca).

*Online appendices are unedited and posted as supplied by the authors.*

Table S1: Changes in GMV over the period of measurement in borderline personality disorder (BPD) patients that received dialectical behavioral therapy (BPD-DBT) and BPD patients that received treatment as usual (BPD-TAU) in the anatomical regions of interest (ROI) within the significant clusters from the group x time interaction; ACC, anterior cingulate cortex; IFG, inferior frontal gyrus; STG, superior temporal gyrus; AG, angular gyurs; SMG, superior marginal gyrus FWE, family-wise-error.

| Anatomical ROI within cluster | Number of voxels | GMV change between $t_1$ and $t_2$ in BPD-DBT ( $t_{(30)}$ , p-value) | Percentage difference in GMV between BPD-DBT and BPD-TAU |
|-------------------------------|------------------|-----------------------------------------------------------------------|----------------------------------------------------------|
| right ACC                     | 1670             | < 0.05                                                                | = 2.04, $p < 0.05$                                       |
| right IFG                     | 611              | < 0.05                                                                | = 2.96, $p < 0.05$                                       |
| left STG                      | 289              | < 0.05                                                                | = 3.15, $p < 0.05$                                       |
| right AG                      | 610              | > 0.05                                                                | = 1.98, $p < 0.05$                                       |
| right SMG                     | 298              | > 0.05                                                                | = 2.99, $p < 0.05$                                       |

*Online appendices are unedited and posted as supplied by the authors.*

| Table S2: Bivariate correlations between the percentage change of GMV in the anatomical regions of interest within the significant clusters from the group x time interaction. |     |        |        |       |        |
|--------------------------------------------------------------------------------------------------------------------------------------------------------------------------------|-----|--------|--------|-------|--------|
|                                                                                                                                                                                | ACC | IFG    | STG    | AG    | SMG    |
| ACC                                                                                                                                                                            |     | 0.57** | 0.52** | 0.37* | 0.56** |
| IFG                                                                                                                                                                            |     |        | 0.62** | 0.43* | 0.74** |
| STG                                                                                                                                                                            |     |        |        | 0.37* | 0.66** |
| AG                                                                                                                                                                             |     |        |        |       | 0.50** |
| SMG                                                                                                                                                                            |     |        |        |       |        |
| ACC, anterior cingulate cortex; IFG, inferior frontal gyrus; STG, superior temporal gyrus; AG, angular gyrus, SMG, superior marginal gyrus; * p < .05, ** p < .01              |     |        |        |       |        |

**Appendix 1** to Mancke F, Schmitt, R, Winter, D. Assessing the marks of change: how psychotherapy alters the brain structure in women with borderline personality disorder. *J Psychiatry Neurosci* 2017.

DOI: 10.1503/jpn.170132

*Online appendices are unedited and posted as supplied by the authors.*

| Table S3: Differences in weight change over the period of measurement of borderline personality disorder (BPD) patients that received dialectical behavioral therapy (BPD-DBT) and BPD patients that received treatment as usual (BPD-TAU). |                |       |                |       |                |      |                |      |                   |      |  |
|---------------------------------------------------------------------------------------------------------------------------------------------------------------------------------------------------------------------------------------------|----------------|-------|----------------|-------|----------------|------|----------------|------|-------------------|------|--|
|                                                                                                                                                                                                                                             | BPD-DBT        |       |                |       | BPD-TAU        |      |                |      | Group differences |      |  |
|                                                                                                                                                                                                                                             | t <sub>1</sub> |       | t <sub>2</sub> |       | t <sub>1</sub> |      | t <sub>2</sub> |      |                   |      |  |
|                                                                                                                                                                                                                                             | M              | SD    | M              | SD    | M              | SD   | M              | SD   | t <sub>(46)</sub> | p    |  |
| Weight (kg)                                                                                                                                                                                                                                 | 71.99          | 17.03 | 71.86          | 17.02 | 60.65          | 8.83 | 61.59          | 9.28 | -1.32             | 0.19 |  |
